# Supplementary material for: Do age, period or cohort effects explain circulatory disease mortality trends, Scotland 1974–2015?
Source: PubMed Central journal article supplement — Heart. 2019 Sep 20;106(8):584–9. doi: 10.1136/heartjnl-2019-315029 (PMC7146945; doi:10.1136/heartjnl-2019-315029), 2019-09-20

## Appendix 2: Statistical analysis – negative binomial count model specification

As Age Period Cohort (APC) regression modelling was not appropriate in this study, we used a multivariable regression framework to model the count of deaths over time. We fitted separate models for deaths from CeVD and IHD (see main manuscript for definitions). As data were count data (i.e. a number of deaths) and the variance exceeded the mean (over-dispersion), we used negative binomial regression models. Variables included in both models were sex, single age at death and Carstairs deprivation (1 'most deprived 40%', 2 'central 20%' and 3 'least deprived 40%'). Carstairs' quintiles were collapsed into the variables in the model in order to maintain consistency with rates and SCP analysis (see main manuscript for detail). Population was accounted for as an offset variable. As counts increased exponentially with age we included an age squared explanatory variable in both disease models. The underlying trend over time in the count data was modelled in a different way for each disease. For CeVD, we used a year squared variable which allowed the underlying trend to be constant but non-linear. For IHD, the study period was split into two sections (pre and post 1990) using the command *mk spline* (Stata/SE 14 (Stata Corp, Texas, 2015)). This command creates multiple cubic splines (where a spline is a curve joining two points). 1990 was chosen as the split point as a change of trend is evident at this point in the descriptive data. We also split the study period into 2-6 equal sections in turn and recorded the Bayes Information Criterion (BIC) for each. The selected model had a lower BIC (indicating a better fit) than any of the alternative specifications.

Interaction variables were added where they were significant (measured using the likelihood ratio test). Interaction variables allow effects of one variable to be different in sub-groups of another, such as age effect being different in males and females. Interaction variables included in the IHD and CeVD models are shown in Table 1. We assessed goodness of fit of the selected model by comparing predicted values with observed values using the  $R^2$  statistic.  $R^2$  is a statistical measure of how close the data are to the fitted model (it is the amount of variance in the outcome variable that is explained by the model) which takes values between zero and one with one being a perfect fit. Our models had  $R^2$  in excess of 99%. Regression analyses were undertaken using STATA/SE 14 software (STATA Corp, Texas, USA).

**Table 1** Interaction variables in negative binomial models

|                           | <b>IHD – name of interaction variable</b> | <b>CeVD - name of interaction variable</b> |
|---------------------------|-------------------------------------------|--------------------------------------------|
| Age and sex               | Int1                                      | Not statistically significant              |
| Year and sex              | Year replaced by pre and post 1990        | Not statistically significant              |
| Year and Carstairs        | Year replaced by pre and post 1990        | Int3                                       |
| Pre-1990 and sex          | Int2                                      | Not applicable                             |
| Post-1990 and sex         | Int3                                      | Not applicable                             |
| Pre-1990 and Carstairs    | Int4                                      | Not applicable                             |
| Post-1990 and Carstairs   | Int5                                      | Not applicable                             |
| Year and age              | -                                         | Int7                                       |
| Year and age squared      | -                                         | Int8                                       |
| Pre-1990 and age          | Int6                                      | Not applicable                             |
| Post-1990 and age         | Int7                                      | Not applicable                             |
| Pre-1990 and age squared  | Int8                                      | Not applicable                             |
| Post-1990 and age squared | Int9                                      | Not applicable                             |
| Carstairs and age         | Int10                                     | Int5                                       |
| Carstairs and sex         | Int11                                     | Int4                                       |

Carstairs variable is 1- most deprived 40% of areas, 2 – central 20% areas, 3 – least deprived 40% of areas

Full model specifications and output are shown as Figures 1 (IHD) and 2 (CeVD) below.

Plots of predicted and observed data are included as Figures 3 (IHD) and 4 (CeVD).

**Figure 1** IHD model specification and regression output

xi: nbreg numer nsex age agesq spl\* cars int\*, exp(denom) iter(50) irr

estat ic

```

Negative binomial regression                Number of obs   =    35,700
                                           LR chi2(17)     =  103551.03
Dispersion = mean                        Prob > chi2     =    0.0000
Log likelihood = -58966.381              Pseudo R2      =    0.4675

```

| numer     | IRR       | Std. Err.  | z       | P> z  | [95% Conf. Interval] |
|-----------|-----------|------------|---------|-------|----------------------|
| nsex      | 15.05245  | .4346664   | 93.90   | 0.000 | 14.22418 15.92895    |
| age       | 1.389669  | .0057602   | 79.39   | 0.000 | 1.378424 1.401004    |
| agesq     | .9983702  | .0000314   | -51.89  | 0.000 | .9983087 .9984317    |
| spl1      | .942366   | .0113597   | -4.92   | 0.000 | .9203623 .9648957    |
| spl2      | 1.236406  | .0231675   | 11.33   | 0.000 | 1.191822 1.282657    |
| cars      | .4740241  | .008127    | -43.54  | 0.000 | .4583601 .4902233    |
| int1      | .9713315  | .0003749   | -75.36  | 0.000 | .9705969 .9720666    |
| int2      | .9985249  | .0009732   | -1.51   | 0.130 | .9966192 1.000434    |
| int3      | 1.008344  | .0015728   | 5.33    | 0.000 | 1.005266 1.011432    |
| int4      | .9933911  | .0005247   | -12.55  | 0.000 | .9923632 .9944201    |
| int5      | 1.001216  | .0008446   | 1.44    | 0.150 | .9995622 1.002873    |
| int6      | 1.000569  | .0003738   | 1.52    | 0.128 | .9998363 1.001302    |
| int7      | .9926032  | .0005757   | -12.80  | 0.000 | .9914754 .9937322    |
| int8      | 1.000006  | 2.90e-06   | 2.10    | 0.036 | 1 1.000012           |
| int9      | 1.000047  | 4.49e-06   | 10.46   | 0.000 | 1.000038 1.000056    |
| int10     | 1.00885   | .0002004   | 44.36   | 0.000 | 1.008457 1.009243    |
| int11     | 1.053473  | .0045182   | 12.15   | 0.000 | 1.044655 1.062366    |
| _cons     | 1.73e-09  | 2.47e-10   | -141.85 | 0.000 | 1.31e-09 2.29e-09    |
| ln(denom) | 1         | (exposure) |         |       |                      |
| /lnalpha  | -4.223118 | .0380815   |         |       | -4.297756 -4.148479  |
| alpha     | .0146529  | .000558    |         |       | .013599 .0157884     |

```

LR test of alpha=0: chibar2(01) = 1360.49          Prob >= chibar2 = 0.000

```

. estat ic

Akaike's information criterion and Bayesian information criterion

| Model | Obs    | ll(null)  | ll(model) | df | AIC      | BIC      |
|-------|--------|-----------|-----------|----|----------|----------|
| .     | 35,700 | -110741.9 | -58966.38 | 19 | 117970.8 | 118131.9 |

Note: N=Obs used in calculating BIC; see [\[R\] BIC note](#).

**Figure 2** CeVD model specification and regression output

```
xi: nbreg numer agesq nsex age nyear cars int3 int4 int5 int6 int7 int8, exp(denom) iter(50) irr
estat ic
```

```
Negative binomial regression      Number of obs   =    35,700
                                LR chi2(12)      =    81815.84
Dispersion   = mean              Prob > chi2     =     0.0000
Log likelihood = -48065.156      Pseudo R2      =     0.4598
```

| numer     | IRR       | Std. Err.  | z      | P> z  | [95% Conf. Interval] |           |
|-----------|-----------|------------|--------|-------|----------------------|-----------|
| agesq     | .9996584  | .0000383   | -8.92  | 0.000 | .9995833             | .9997334  |
| nsex      | 1.262057  | .0152965   | 19.20  | 0.000 | 1.23243              | 1.292397  |
| age       | 1.1648    | .0057569   | 30.87  | 0.000 | 1.153571             | 1.176139  |
| nyear     | 1.059597  | .0051659   | 11.87  | 0.000 | 1.04952              | 1.069771  |
| nyearsq   | .9994498  | .00002     | -27.44 | 0.000 | .9994105             | .999489   |
| cars      | .9376628  | .0598021   | -1.01  | 0.313 | .8274827             | 1.062513  |
| int3      | .9962351  | .0002454   | -15.31 | 0.000 | .9957543             | .9967161  |
| int4      | .9859688  | .0055635   | -2.50  | 0.012 | .9751246             | .9969335  |
| int5      | .9920457  | .001943    | -4.08  | 0.000 | .9882449             | .9958612  |
| int6      | 1.000117  | .0000151   | 7.75   | 0.000 | 1.000087             | 1.000147  |
| int7      | .9973626  | .0001478   | -17.82 | 0.000 | .997073              | .9976523  |
| int8      | 1.000023  | 1.15e-06   | 20.33  | 0.000 | 1.000021             | 1.000026  |
| _cons     | 6.16e-07  | 9.82e-08   | -89.63 | 0.000 | 4.50e-07             | 8.42e-07  |
| ln(denom) | 1         | (exposure) |        |       |                      |           |
| /lnalpha  | -4.350457 | .0718116   |        |       | -4.491205            | -4.209709 |
| alpha     | .0129009  | .0009264   |        |       | .0112071             | .0148507  |

```
LR test of alpha=0: chibar2(01) = 292.74 Prob >= chibar2 = 0.000
```

```
. estat ic
```

```
Akaike's information criterion and Bayesian information criterion
```

| Model | Obs    | ll(null)  | ll(model) | df | AIC      | BIC      |
|-------|--------|-----------|-----------|----|----------|----------|
| .     | 35,700 | -88973.08 | -48065.16 | 14 | 96158.31 | 96277.07 |

**Figure 3** IHD Predicted and observed data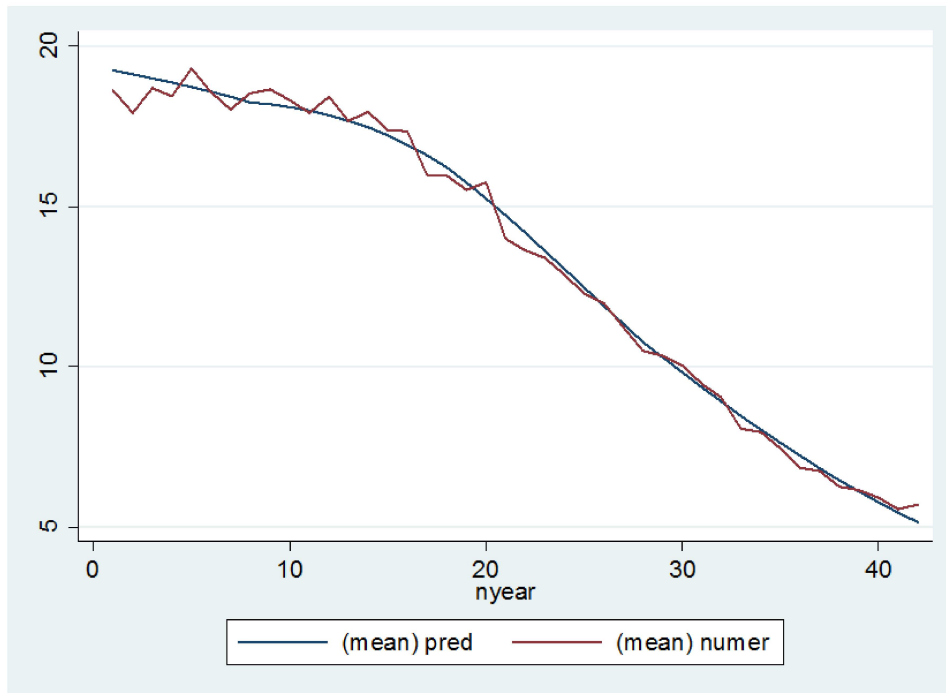**Figure 4** CeVD Predicted and observed data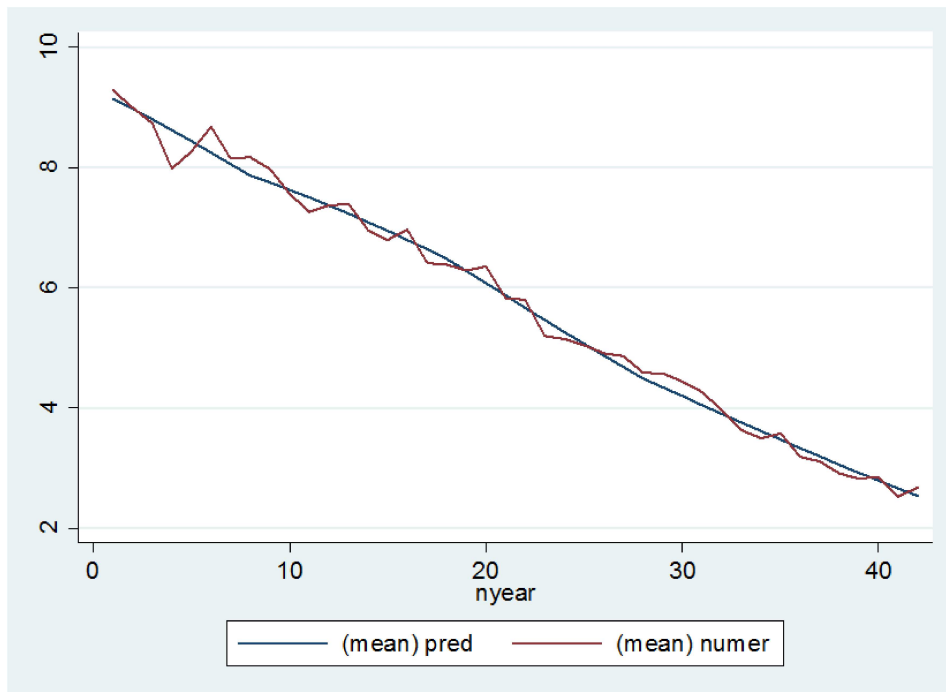

Supplement: heartjnl-2019-315029supp003.pdf [file heartjnl-2019-315029supp003.pdf]
