# Supplementary material for: Do age, period or cohort effects explain circulatory disease mortality trends, Scotland 1974–2015?
Source: PubMed Central journal article supplement — Heart. 2019 Sep 20;106(8):584–9. doi: 10.1136/heartjnl-2019-315029 (PMC7146945; doi:10.1136/heartjnl-2019-315029), 2019-09-20
Supplement: heartjnl-2019-315029supp004.pdf [file heartjnl-2019-315029supp004.pdf]

## Appendix 3: Slope and relative index of inequality analysis

To present changes in the absolute and relative inequalities over the time period by sex, the slope and relative index of inequality (RII and SII) were estimated for the age-standardised death rates using the linear regression approach described by Pamuk 1985\*

Figure 1 Ischaemic heart disease age-standardised death rate A) slope index of inequality (SII) and B) relative index of inequality (RII) 3 year rolling averages per year in Scotland, 1974-2015 by sex

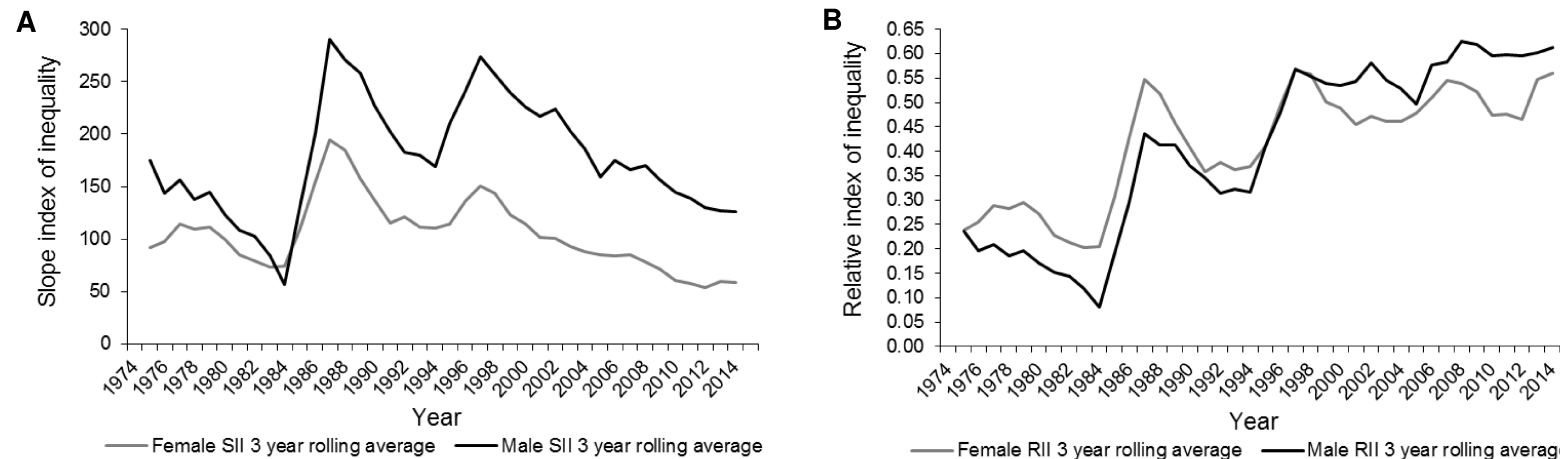

Figure 2 Cerebrovascular disease age-standardised death rate A) slope index of inequality (SII) and B) relative index of inequality (RII) 3 year rolling averages per year in Scotland, 1974-2015 by sex

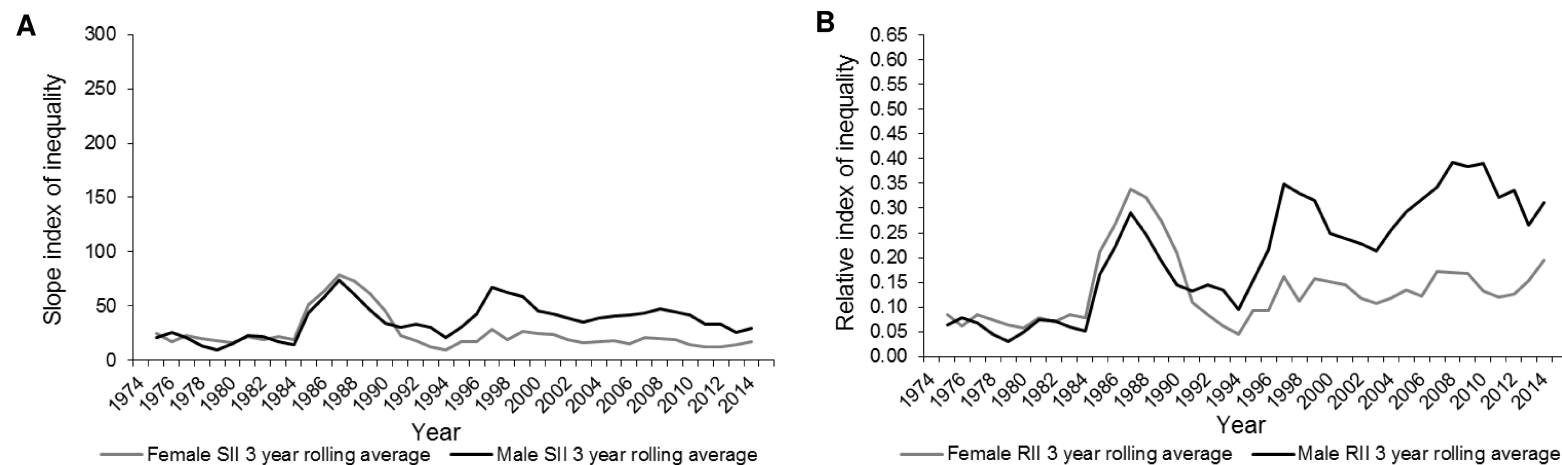

\* Pamuk ER. Social class and inequality in mortality from 1921 to 1972 in England and Wales. *Population Studies* 1985;39:17-31

Table 1 Ischaemic heart disease age-standardised death rate A) slope index of inequality (SII) and relative index of inequality (RII) 3 year rolling averages per year in Scotland, 1974-2015 by sex

| SII 3 year rolling average |        |        | RII 3 year rolling average |        |       |
|----------------------------|--------|--------|----------------------------|--------|-------|
| Year                       | Female | Male   | Year                       | Female | Male  |
| 1974                       |        |        | 1974                       |        |       |
| 1975                       | 91.98  | 175.13 | 1975                       | 0.239  | 0.235 |
| 1976                       | 97.43  | 143.82 | 1976                       | 0.254  | 0.196 |
| 1977                       | 114.14 | 156.09 | 1977                       | 0.288  | 0.209 |
| 1978                       | 109.68 | 138.12 | 1978                       | 0.284  | 0.185 |
| 1979                       | 111.85 | 144.43 | 1979                       | 0.296  | 0.196 |
| 1980                       | 99.60  | 123.25 | 1980                       | 0.272  | 0.172 |
| 1981                       | 84.97  | 108.83 | 1981                       | 0.229  | 0.153 |
| 1982                       | 79.53  | 102.89 | 1982                       | 0.213  | 0.144 |
| 1983                       | 73.70  | 83.60  | 1983                       | 0.202  | 0.119 |
| 1984                       | 74.28  | 56.29  | 1984                       | 0.204  | 0.080 |
| 1985                       | 109.66 | 130.81 | 1985                       | 0.307  | 0.193 |
| 1986                       | 154.04 | 200.07 | 1986                       | 0.428  | 0.296 |
| 1987                       | 194.91 | 290.80 | 1987                       | 0.548  | 0.437 |
| 1988                       | 184.38 | 270.58 | 1988                       | 0.517  | 0.414 |
| 1989                       | 157.68 | 258.25 | 1989                       | 0.457  | 0.412 |
| 1990                       | 137.10 | 227.04 | 1990                       | 0.409  | 0.371 |
| 1991                       | 114.82 | 202.50 | 1991                       | 0.358  | 0.346 |
| 1992                       | 121.09 | 182.73 | 1992                       | 0.377  | 0.315 |
| 1993                       | 111.85 | 179.75 | 1993                       | 0.362  | 0.322 |
| 1994                       | 110.52 | 168.73 | 1994                       | 0.369  | 0.315 |
| 1995                       | 114.32 | 210.49 | 1995                       | 0.411  | 0.411 |
| 1996                       | 135.49 | 240.25 | 1996                       | 0.496  | 0.483 |
| 1997                       | 150.31 | 273.56 | 1997                       | 0.566  | 0.568 |
| 1998                       | 143.98 | 257.42 | 1998                       | 0.558  | 0.555 |
| 1999                       | 123.17 | 239.37 | 1999                       | 0.501  | 0.539 |
| 2000                       | 114.74 | 226.14 | 2000                       | 0.488  | 0.534 |
| 2001                       | 101.25 | 216.66 | 2001                       | 0.455  | 0.544 |
| 2002                       | 100.45 | 223.77 | 2002                       | 0.471  | 0.580 |
| 2003                       | 93.10  | 202.04 | 2003                       | 0.460  | 0.545 |
| 2004                       | 87.85  | 185.99 | 2004                       | 0.462  | 0.529 |
| 2005                       | 84.96  | 159.69 | 2005                       | 0.479  | 0.497 |
| 2006                       | 83.91  | 175.24 | 2006                       | 0.509  | 0.576 |
| 2007                       | 84.56  | 166.30 | 2007                       | 0.546  | 0.583 |
| 2008                       | 77.96  | 169.79 | 2008                       | 0.539  | 0.625 |
| 2009                       | 71.37  | 156.80 | 2009                       | 0.521  | 0.618 |
| 2010                       | 60.45  | 144.39 | 2010                       | 0.474  | 0.595 |
| 2011                       | 57.89  | 138.33 | 2011                       | 0.477  | 0.598 |
| 2012                       | 53.49  | 129.55 | 2012                       | 0.465  | 0.595 |
| 2013                       | 59.20  | 126.63 | 2013                       | 0.547  | 0.602 |
| 2014                       | 58.20  | 125.82 | 2014                       | 0.559  | 0.613 |
| 2015                       |        |        | 2015                       |        |       |

Table 2 Cerebrovascular disease age-standardised death rate A) slope index of inequality (SII) and relative index of inequality (RII) 3 year rolling averages per year in Scotland, 1974-2015 by sex

| SII 3 year rolling average |        |       | RII 3 year rolling average |        |       |
|----------------------------|--------|-------|----------------------------|--------|-------|
| Year                       | Female | Male  | Year                       | Female | Male  |
| 1974                       |        |       | 1974                       |        |       |
| 1975                       | 24.61  | 20.97 | 1975                       | 0.084  | 0.063 |
| 1976                       | 16.65  | 25.40 | 1976                       | 0.061  | 0.079 |
| 1977                       | 22.94  | 21.28 | 1977                       | 0.084  | 0.068 |
| 1978                       | 20.20  | 13.59 | 1978                       | 0.074  | 0.045 |
| 1979                       | 17.56  | 9.68  | 1979                       | 0.063  | 0.031 |
| 1980                       | 15.80  | 15.55 | 1980                       | 0.056  | 0.050 |
| 1981                       | 21.42  | 22.55 | 1981                       | 0.078  | 0.074 |
| 1982                       | 19.30  | 21.67 | 1982                       | 0.071  | 0.072 |
| 1983                       | 22.02  | 16.78 | 1983                       | 0.085  | 0.060 |
| 1984                       | 19.05  | 13.79 | 1984                       | 0.079  | 0.052 |
| 1985                       | 50.66  | 43.92 | 1985                       | 0.211  | 0.165 |
| 1986                       | 63.20  | 57.50 | 1986                       | 0.268  | 0.222 |
| 1987                       | 78.65  | 73.39 | 1987                       | 0.339  | 0.291 |
| 1988                       | 72.78  | 60.12 | 1988                       | 0.321  | 0.246 |
| 1989                       | 61.20  | 46.19 | 1989                       | 0.274  | 0.193 |
| 1990                       | 45.75  | 34.16 | 1990                       | 0.208  | 0.144 |
| 1991                       | 22.84  | 29.93 | 1991                       | 0.109  | 0.133 |
| 1992                       | 17.55  | 32.96 | 1992                       | 0.084  | 0.145 |
| 1993                       | 12.77  | 30.12 | 1993                       | 0.062  | 0.135 |
| 1994                       | 9.30   | 20.57 | 1994                       | 0.045  | 0.095 |
| 1995                       | 17.11  | 30.65 | 1995                       | 0.093  | 0.152 |
| 1996                       | 16.81  | 42.81 | 1996                       | 0.093  | 0.216 |
| 1997                       | 28.29  | 67.18 | 1997                       | 0.161  | 0.350 |
| 1998                       | 19.36  | 62.22 | 1998                       | 0.112  | 0.331 |
| 1999                       | 26.77  | 58.25 | 1999                       | 0.157  | 0.315 |
| 2000                       | 24.95  | 44.97 | 2000                       | 0.150  | 0.249 |
| 2001                       | 23.88  | 42.41 | 2001                       | 0.144  | 0.239 |
| 2002                       | 18.91  | 38.89 | 2002                       | 0.118  | 0.227 |
| 2003                       | 16.17  | 34.92 | 2003                       | 0.107  | 0.214 |
| 2004                       | 17.46  | 38.40 | 2004                       | 0.119  | 0.255 |
| 2005                       | 18.25  | 40.87 | 2005                       | 0.134  | 0.292 |
| 2006                       | 15.29  | 42.07 | 2006                       | 0.121  | 0.317 |
| 2007                       | 20.94  | 43.66 | 2007                       | 0.171  | 0.343 |
| 2008                       | 19.97  | 47.00 | 2008                       | 0.170  | 0.393 |
| 2009                       | 18.94  | 44.24 | 2009                       | 0.168  | 0.384 |
| 2010                       | 13.82  | 41.90 | 2010                       | 0.132  | 0.391 |
| 2011                       | 12.01  | 32.92 | 2011                       | 0.120  | 0.323 |
| 2012                       | 12.19  | 33.20 | 2012                       | 0.126  | 0.337 |
| 2013                       | 14.09  | 25.10 | 2013                       | 0.153  | 0.266 |
| 2014                       | 17.30  | 29.13 | 2014                       | 0.194  | 0.312 |
| 2015                       |        |       | 2015                       |        |       |
